# Supplementary material for: White-Light Emission of Dye-Doped Polymer Submicronic Fibers Produced by Electrospinning
Source: MDPI journal article supplement (doi:10.3390/polym10070737), 2018-07-04
Supplement: s1 [file s1]

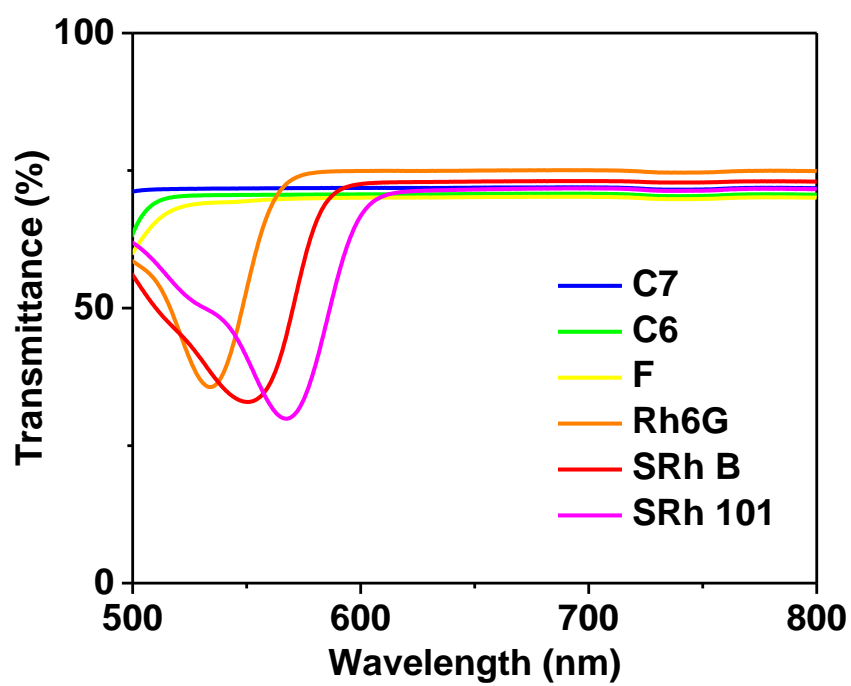

Figure S1. Transmission spectra for the single-dye doped polymer fiber mats produced by electrospinning.
